# Supplementary material
Source: PubMed Central journal article supplement (PMC4844862)
Supplement: NIHMS749636-supplement-01.pdf [file NIHMS749636-supplement-01.pdf]

The following 2 new tables are intended as online only supplemental tables.

Table S1. Infant Deaths by Gestational Age and Status of Maternal Antenatal Corticosteroid Receipt, California Perinatal Quality Care Collaborative, Stanford, CA, 2007-2013

| Gestational Age (Weeks) | Total Infants<br>N = 25,979 | Total Deaths<br>N = 2025<br>(7.8%) | Infants whose mothers received ACS<br>N = 22645 | Deaths among infants whose mothers received ACS<br>N = 1567<br>(6.9%) | Infants whose mothers did not receive ACS<br>N = 3334 | Deaths among infants whose mothers did not receive ACS<br>N = 458<br>(13.7%) |
|-------------------------|-----------------------------|------------------------------------|-------------------------------------------------|-----------------------------------------------------------------------|-------------------------------------------------------|------------------------------------------------------------------------------|
| <= 22 6/7               | 123                         | 70 (56.9%)                         | 57                                              | 23 (40.4%)                                                            | 66                                                    | 47 (71.2%)                                                                   |
| 23 0/7 – 23 6/7         | 809                         | 334 (41.3%)                        | 582                                             | 225 (38.7%)                                                           | 227                                                   | 109 (48.0%)                                                                  |
| 24 0/7 – 24 6/7         | 1884                        | 495 (26.3%)                        | 1635                                            | 402 (24.6%)                                                           | 249                                                   | 93 (37.4%)                                                                   |
| 25 0/7 – 25 6/7         | 2256                        | 320 (14.2%)                        | 1994                                            | 276 (13.8%)                                                           | 262                                                   | 44 (16.8%)                                                                   |
| 26 0/7 – 26 6/7         | 2663                        | 261 (9.8%)                         | 2352                                            | 213 (9.1%)                                                            | 311                                                   | 48 (15.4%)                                                                   |
| 27 0/7 – 27 6/7         | 3073                        | 170 (5.5%)                         | 2697                                            | 137 (5.1%)                                                            | 376                                                   | 33 (8.8%)                                                                    |
| 28 0/7 – 28 6/7         | 3603                        | 149 (4.1%)                         | 3176                                            | 122 (3.9%)                                                            | 427                                                   | 27 (6.3%)                                                                    |
| 29 0/7 – 29 6/7         | 3903                        | 89 (2.3%)                          | 3468                                            | 71 (2.1%)                                                             | 435                                                   | 18 (4.1%)                                                                    |
| 30 0/7 – 30 6/7         | 3543                        | 67 (1.9%)                          | 3104                                            | 50 (1.6%)                                                             | 439                                                   | 17 (3.9%)                                                                    |
| 31 0/7 – 31 6/7         | 2494                        | 41 (1.6%)                          | 2192                                            | 30 (1.4%)                                                             | 302                                                   | 11 (3.7%)                                                                    |
| 32 0/7 – 32 6/7         | 1625                        | 29 (1.8%)                          | 1385                                            | 18 (1.3%)                                                             | 240                                                   | 11 (4.6%)                                                                    |

\*Gestational age (Missing = 3)

Table S2. Maternal, infant, and delivery characteristics of infants missing information on antenatal corticosteroid receipt or IVH status (N = 5175), California Perinatal Quality Care Collaborative, Stanford, CA, 2007-2013

|                                  | Mean  | Standard deviation |
|----------------------------------|-------|--------------------|
| Birth weight                     | 796.0 | 348.2              |
| Gestational age                  | 25.4  | 3.5                |
| Maternal age                     | 28.6  | 6.8                |
|                                  | N     | (%)                |
| Maternal race / ethnicity        |       |                    |
| Black                            | 765   | (15.2)             |
| Hispanic                         | 2389  | (47.5)             |
| Non-Hispanic White               | 1191  | (23.7)             |
| Asian/Pacific Islander           | 549   | (10.9)             |
| American Indian or Alaska Native | 35    | (0.7)              |
| Other                            | 105   | (2.1)              |
| Prenatal Care                    |       |                    |
| Yes                              | 4766  | (93.8)             |
| No                               | 314   | (6.2)              |
| Multiple gestation               |       |                    |
| Singleton                        | 3957  | (76.7)             |
| Multiple                         | 1201  | (23.3)             |
| Mode of delivery                 |       |                    |
| Vaginal                          | 2748  | (53.2)             |
| Cesarean                         | 2422  | (46.9)             |
| Neonatal unit level              |       |                    |
| Regional                         | 1016  | (19.6)             |
| Community                        | 2879  | (55.6)             |
| Intermediate                     | 747   | (14.4)             |
| Non-CCS                          | 533   | (10.3)             |
| Congenital malformation          |       |                    |
| Yes                              | 624   | (12.2)             |
| No                               | 4480  | (87.8)             |
| Small for gestational age        |       |                    |
| Yes                              | 680   | (13.1)             |
| No                               | 4493  | (86.9)             |
| Apgar score – 5 minute           |       |                    |
| 0-3                              | 2684  | (52.6)             |
| 4-6                              | 638   | (12.5)             |
| 7-10                             | 1780  | (34.9)             |
| Sex                              |       |                    |
| Male                             | 2800  | (54.3)             |
| Female                           | 2357  | (45.7)             |

(N) number of records were missing for the following variables: gestational age (2), maternal age (50), maternal race / ethnicity (141), prenatal care (95), multiple gestation (17), mode of delivery (5), congenital malformation (71), small for gestational age (2), Apgar score (73), sex (18)
